# Supplementary material for: Molecular tubes and capsules : Part III. The first X-ray crystallographic evidence of a cyclic aniline trimer via self-complementary N–H⋯π interactions: the aniline inclusion both inside and outside the macrocyclic cavity
Source: Royal Society of Chemistry journal article supplement (doi:10.1039/b718306b), 2008-01-01
Supplement: b718306b.pdf [file b718306b.pdf]

**The first X-Ray crystallographic evidence of a cyclic aniline trimer via self-complementary NH- $\pi$  interactions: The aniline inclusion both inside and outside the macrocyclic cavity**

*Shin-ichiro Kato, Takeshi Nakagaki, Toshiaki Shimasaki, Teruo Shinmyozu\**

Institute for Materials Chemistry and Engineering (IMCE) and Department of Molecular Chemistry, Graduate School of Sciences, Kyushu University, 6-10-1 Higashi-ku, Fukuoka 812-8581, Japan

**Contents**

1. General experimental methods and experimental procedures for **2** and **3**.
2.  $^1\text{H}$  and  $^{13}\text{C}$  NMR spectra of **2** and **3** in  $\text{CDCl}_3$  solution.
3. NOE or ROE spectra of **1-3** in  $\text{CDCl}_3$  solution.
4. X-ray Crystallographic Structure Analysis.
5. Complexation studies.
6. Theoretical calculations.
7. References

### 1. General experimental methods and experimental procedures for 2 and 3

IR spectra were recorded on a JASCO FT/IR-470 plus Fourier Transform Infrared Spectrometer and measured as KBr pellets.  $^1\text{H}$  NMR spectra were determined in  $\text{CDCl}_3$  or  $\text{DMSO-}d_6$  with a JEOL JNM-AL 300 spectrometer. Chemical shifts ( $\delta$ ) are given as  $\delta$  values (ppm) relative to tetramethylsilane (TMS). The coupling constants ( $J$ ) are given in hertz. Elemental analyses were performed by the Service Centre of the Elemental Analysis of Organic Compound affiliates with the Faculty of Science, Kyushu University. FAB-MS spectra were recorded with a JEOL JMS-SX/SX 102A mass spectrometer with *m*-nitrobenzyl alcohol as a matrix. ESI-MS spectra were recorded with a JEOL JMS-T100CS mass spectrometer. UV/Vis spectra were measured on a JASCO V-570 spectrophotometer in a 1 cm width quartz cell. Analytical TLC was carried out on silica gel Merck 60 F<sub>254</sub>. Column chromatography was carried out on silica gel (KANTO 60N). THF was distilled from sodium and benzophenone under an argon atmosphere just before use. Aniline was distilled from Zn powder just before use.

**Pyromellitic Diimide-Based Macrocycles 2 and 3.** A solution of 2,7-bis(aminomethyl)-3,6-di-*n*-hexyloxynaphthalene (1.06 g, 2.74 mmol) in dry THF (100 mL) and a solution of pyromellitic dianhydride (968 mg, 2.74 mmol) in dry THF (100 mL) were simultaneously added to dry THF (50 mL) at 50 °C over a period of 4 h with stirring under an argon atmosphere. After the addition, the reaction mixture was stirred at 50 °C for 24 h, and the reaction mixture was evaporated in vacuo to dryness to give the amic acid. In the  $^1\text{H}$  NMR spectra, the broad COOH signals of the intermediate amic acid derivatives were observed at around 13–14 ppm in  $\text{DMSO-}d_6$  solution. A solution of the amic acid and NaOAc (985 mg, 11.9 mmol) in  $\text{Ac}_2\text{O}$  (48 mL) were stirred at room temperature for 3 h under an argon atmosphere, and then heated at 100 °C for 2 h. The reaction mixture was poured into water (300 mL), and the precipitate was collected by filtration. The precipitate was continuously extracted with  $\text{CHCl}_3$  in a Soxhlet extractor, and the extract was evaporated in vacuo to dryness. The residue was purified by silica gel column chromatography eluting with  $\text{CHCl}_3$  to give **2** in 14% yield (217 mg, 0.19 mmol) as pale green powder and **3** in 4% yield (60 mg, 353  $\mu\text{mol}$ ) as green powder. A single crystal of **2**·(toluene)<sub>4</sub> was grown by the toluene solution.

**2:** mp > 300 °C; IR (KBr)  $\nu_{\text{max}}$  2954, 2929, 2868, 2858, 1776 ( $\nu_{\text{C=O}}$ ), 1728 ( $\nu_{\text{C=O}}$ ), 1639, 1419, 1381, 1319, 1252, 1221, 1140, 1119, 1022  $\text{cm}^{-1}$ ;  $^1\text{H}$  NMR (300 MHz,  $\text{CDCl}_3$ )  $\delta$  0.93 (t,  $J$  = 6.4 Hz, 12 H,  $\text{CH}_3$ ), 1.37–1.42 (m, 16 H,  $\text{CH}_2$ ), 1.52–1.59 (m, 8 H,  $\text{CH}_2$ ), 1.90 (tt,  $J$  = 6.4 Hz, 8 H,  $\text{CH}_2$ ), 4.12 (t,  $J$  = 6.4 Hz, 8 H,  $\text{OCH}_2$ ), 5.06 (s, 8 H, benzyl H), 6.80 (s, 4 H, ArH), 7.05 (s, 4 H, ArH), 8.42 (s, 4 H, ArH);  $^{13}\text{C}$  NMR (75 MHz,  $\text{CDCl}_3$ )  $\delta$  14.1, 22.6, 25.9, 29.2, 31.6, 68.1, 77.2, 105.0, 118.7, 122.3, 122.4, 122.6, 134.5, 137.4, 154.8, 165.8; FAB-MS (NBA,

positive) 1136 ( $M^+$ ). HR-FAB-MS (NBA, positive)  $m/z$ ; calcd. for  $C_{68}H_{72}N_4O_{12}$ : 1136.5147 ( $M^+$ ), found: 1136.5164. Anal. Calcd. For  $C_{68}H_{72}N_4O_{12} \cdot 0.07CHCl_3$ : C, 71.36; H, 6.34; N, 4.89. Found: C, 71.35; H, 6.38; N, 4.90.

**3**: mp > 300 °C; IR (KBr)  $\nu_{max}$  2953, 2929, 2870, 1774 ( $\nu_{C=O}$ ), 1724 ( $\nu_{C=O}$ ), 1637, 1506, 1385, 1346, 1254, 1225, 1111  $cm^{-1}$ ;  $^1H$  NMR (300 MHz,  $CDCl_3$ )  $\delta$  0.90 (t,  $J = 6.5$  Hz, 18 H,  $CH_3$ ), 1.31–1.40 (m, 24 H,  $CH_2$ ), 1.43–1.49 (m, 12 H,  $CH_2$ ), 1.83 (tt,  $J = 6.4$  Hz, 12 H,  $CH_2$ ), 4.02 (t,  $J = 6.4$  Hz, 12 H,  $OCH_2$ ), 5.02 (s, 12 H, benzyl H), 6.95 (s, 6 H, ArH), 7.46 (s, 6 H, ArH), 8.27 (s, 6 H, ArH);  $^{13}C$  NMR (75 MHz,  $CDCl_3$ )  $\delta$  14.1, 22.6, 25.9, 29.1, 31.6, 68.1, 77.2, 104.8, 118.4, 122.3, 122.6, 128.1, 135.4, 137.3, 155.6, 165.9; FAB-MS (NBA, positive) 1705 [ $(M+H)^+$ ]. HR-FAB-MS (NBA, positive)  $m/z$ ; calcd. for  $C_{102}H_{108}N_6O_{18}$ : 1704.7720 ( $M^+$ ), found: 1704.7729.



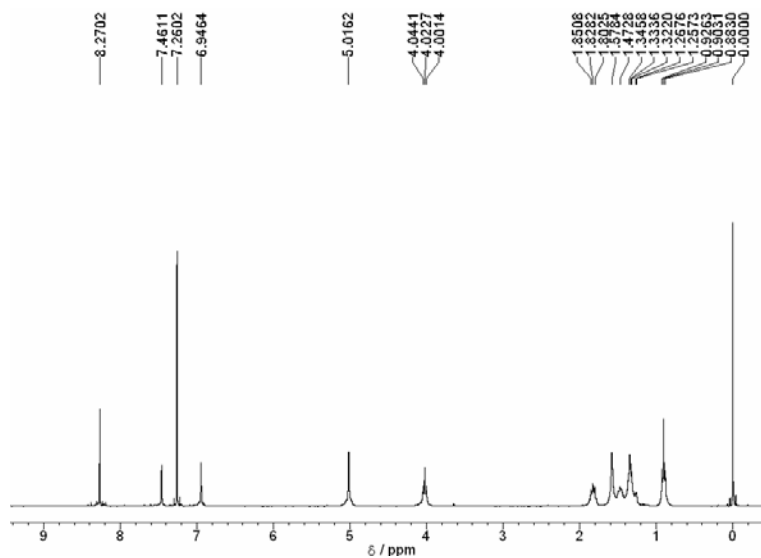

Figure S3.  $^1\text{H}$  NMR spectra of [3 + 3] macrocycle **3** in  $\text{CDCl}_3$  solution.

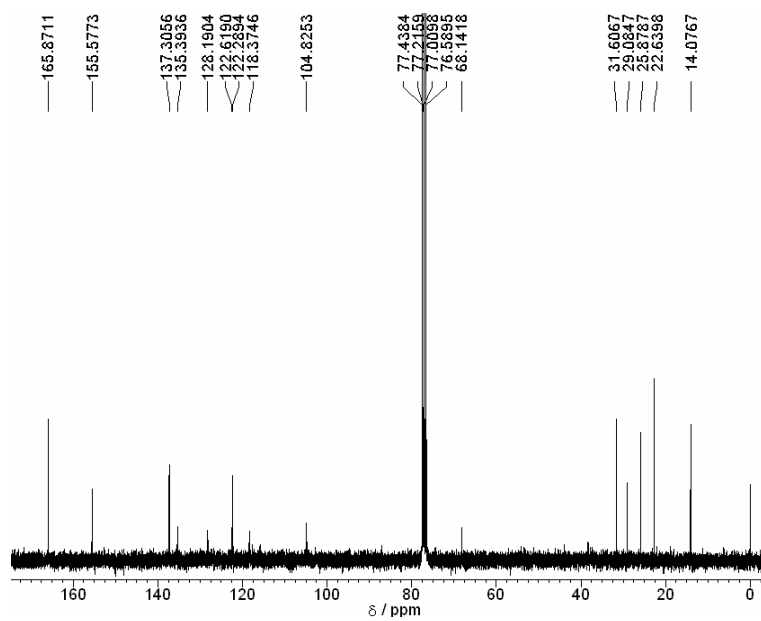

Figure S4.  $^{13}\text{C}$  NMR spectra of [3 + 3] macrocycle **3** in  $\text{CDCl}_3$  solution.

3.

### NOE or ROE spectra of 1-3 in CDCl<sub>3</sub> solution

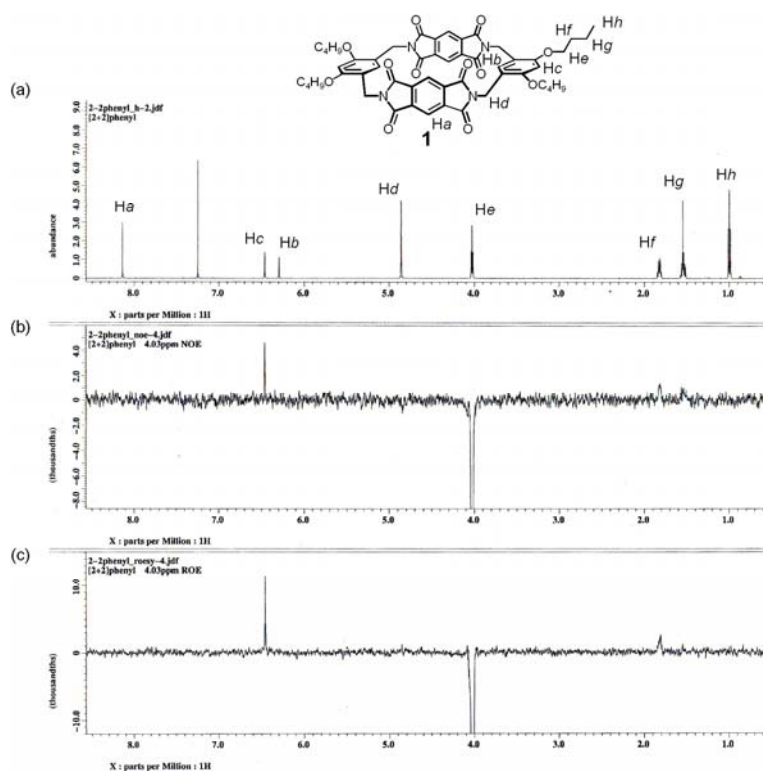

Figure S5. (a) <sup>1</sup>H NMR (b) NOE (c) ROE spectra of **1** in CDCl<sub>3</sub> solution.

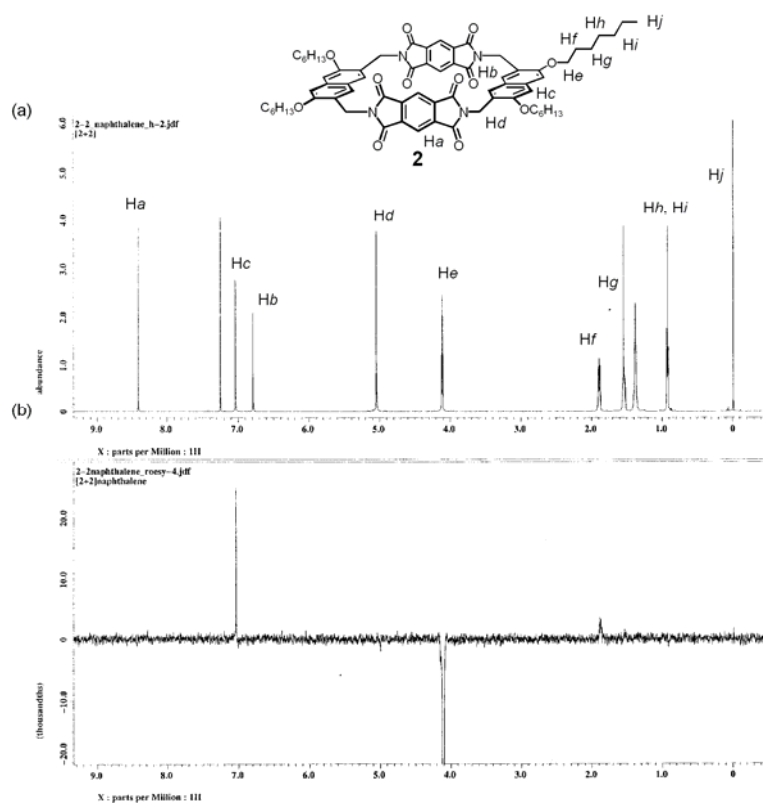

Figure S6. (a) <sup>1</sup>H NMR (b) NOE spectra of **2** in CDCl<sub>3</sub> solution.

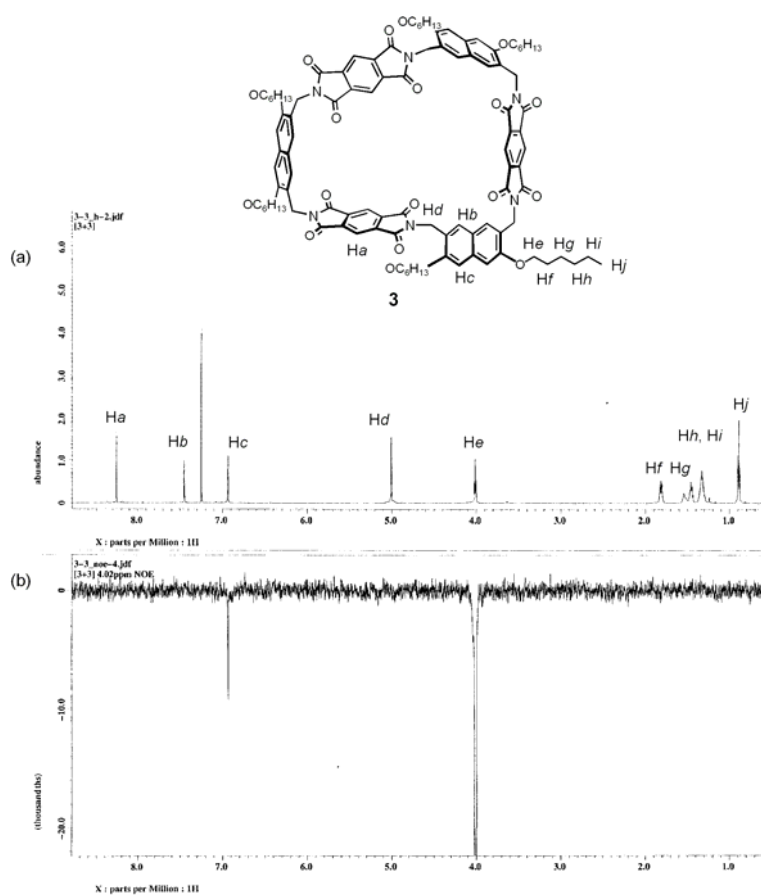

**Figure S7.** (a)  $^1\text{H}$  NMR (b) NOE spectra of **3** in  $\text{CDCl}_3$  solution.

#### 4. X-ray Crystallographic Structure Analysis<sup>S1</sup>

**X-ray Crystal Structure Analysis of 2·(toluene)<sub>4</sub>.** X-ray crystallography was performed on a Rigaku RAXIS RAPID imaging plate diffractometer with graphite monochromated Mo K $\alpha$  radiation ( $\lambda = 0.71069$ ). The data were collected at 113 K using  $\omega$  scan in the  $\theta$  range of 1.1–27.5 deg. A total of 58764 reflections were measured, of which 18092 were independent reflections ( $R_{\text{int}} = 0.0840$ ). The structure was solved by direct methods (Sir97) and refined by the full-matrix least-squares on  $F^2$  (SHELXL-97). All non-hydrogen atoms were refined anisotropically and all hydrogen atoms were placed using AFIX instructions. One toluene molecule was disordered dynamically and solved using appropriate disorder models. The crystal data are as follows: C<sub>96</sub>H<sub>104</sub>N<sub>4</sub>O<sub>12</sub>; FW = 1505.83, crystal size 0.55 × 0.51 × 0.12 mm<sup>3</sup>, Monoclinic,  $P2_1/c$ ,  $a = 12.0793(4)$  Å,  $b = 29.4107(9)$  Å,  $c = 23.5417(8)$  Å,  $\beta = 97.9242(9)^\circ$ ,  $V = 8283.6(5)$  Å<sup>3</sup>,  $Z = 4$ ,  $D_c = 1.207$  g cm<sup>-3</sup>. The refinement converged to  $R_1 = 0.0655$ ,  $wR_2 = 0.1655$  for  $I > 2\sigma(I)$ ,  $R_1 = 0.1187$ ,  $wR_2 = 0.1888$ , GOF = 1.087 for all data. CCDC-658507 contains the supplementary crystallographic data for this paper. These data can be obtained free of charge from the Cambridge Crystallographic Data Service via [www.ccdc.cam.ac.uk/data\\_request/cif](http://www.ccdc.cam.ac.uk/data_request/cif).

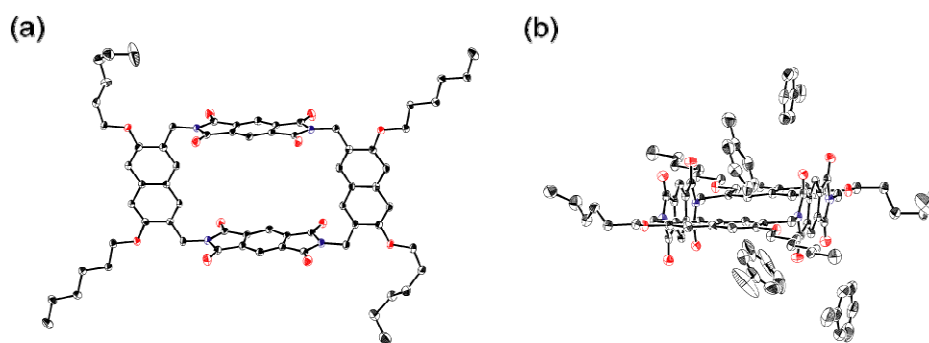

**Figure S8.** ORTEP drawings of 2·(toluene)<sub>4</sub>. The atoms are drawn as 50% probability level of thermal ellipsoids and hydrogen atoms are omitted for clarity. (a) side view, toluene molecules are omitted for clarity; (b) bird's-eye view.



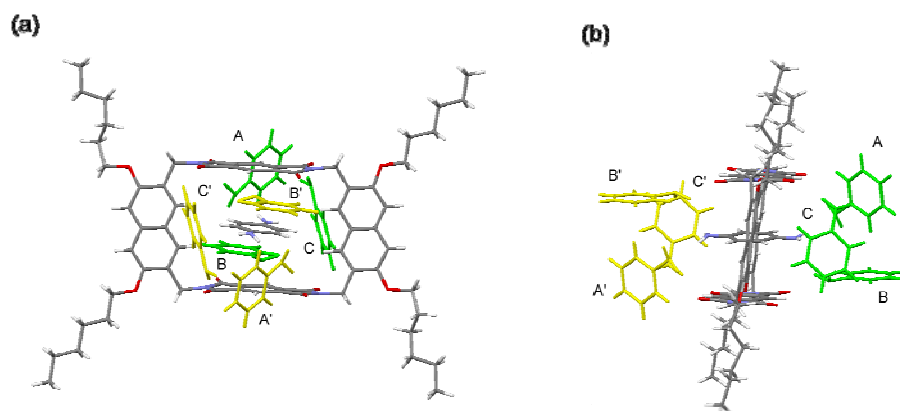

**Figure S9.** X-ray crystal structure of  $2\text{-(aniline)}_7$ . The two types of cyclic aniline trimers with *R* and *S* configurations are represented by yellow and green colors, respectively.

## 5. Complexation studies

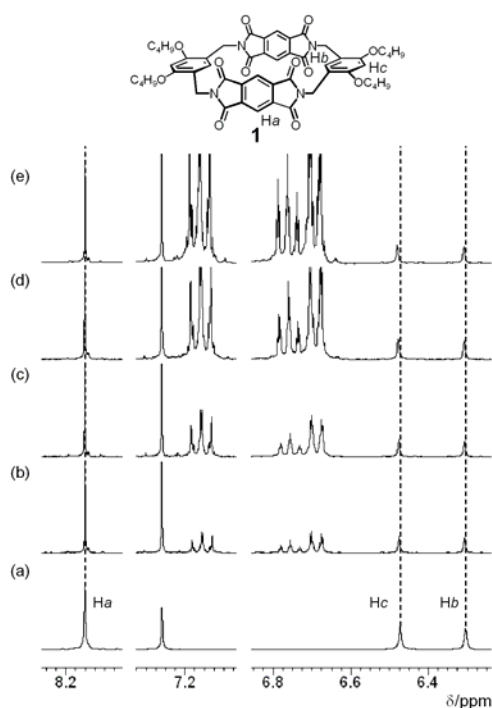

**Figure S9.**  $^1\text{H}$  NMR observation of **1** recorded in  $\text{CDCl}_3$  at  $5 \times 10^{-3}$  M (300 MHz, 25 °C) in the presence of (a) 0, (b) 2, (c) 5, (d) 10, or (e) 20 equiv of aniline.

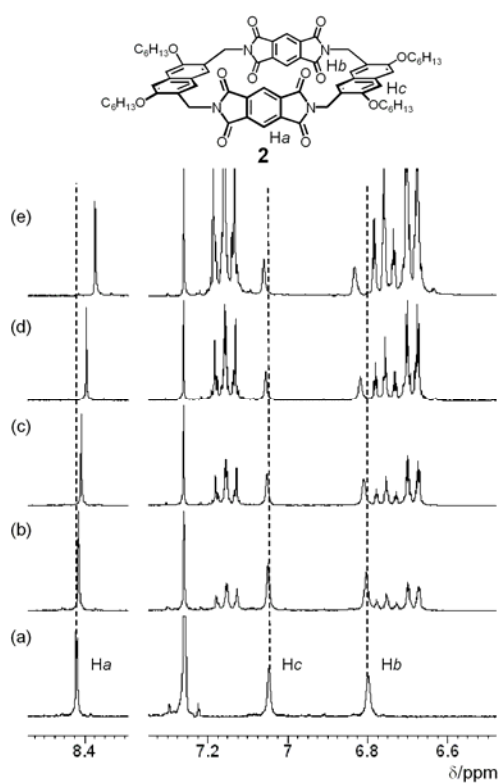

**Figure S10.**  $^1\text{H}$  NMR observation of **2** recorded in  $\text{CDCl}_3$  at  $5 \times 10^{-3}$  M (300 MHz, 25 °C) in the presence of (a) 0, (b) 2, (c) 5, (d) 10, or (e) 20 equiv of aniline.

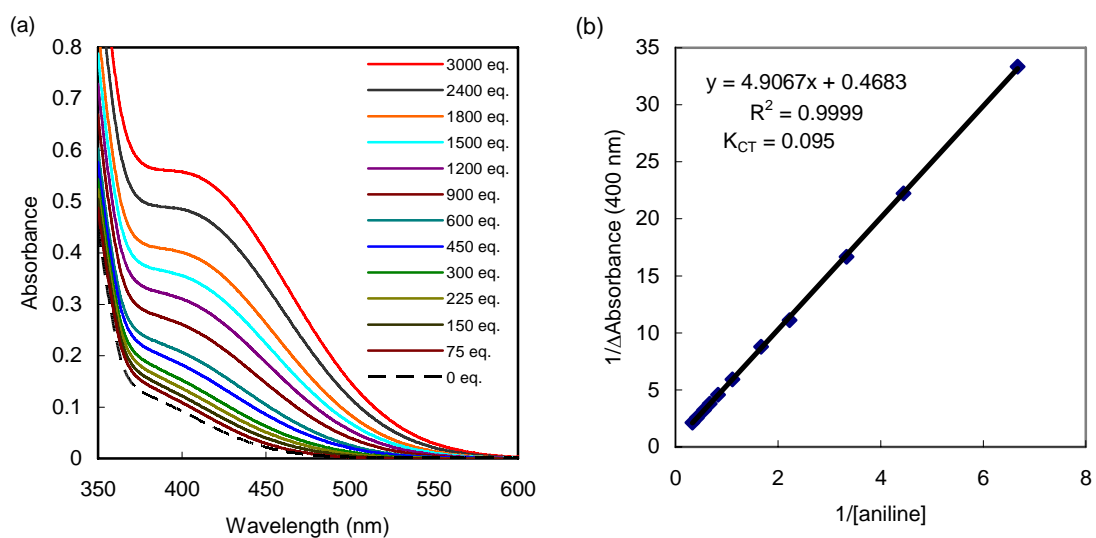

**Figure S11.** (a) Absorption spectra of **1** in CHCl<sub>3</sub> at 1 × 10<sup>-3</sup> M in the presence of 0–3000 equiv of aniline. (b) Benesi-Hildebrand plot

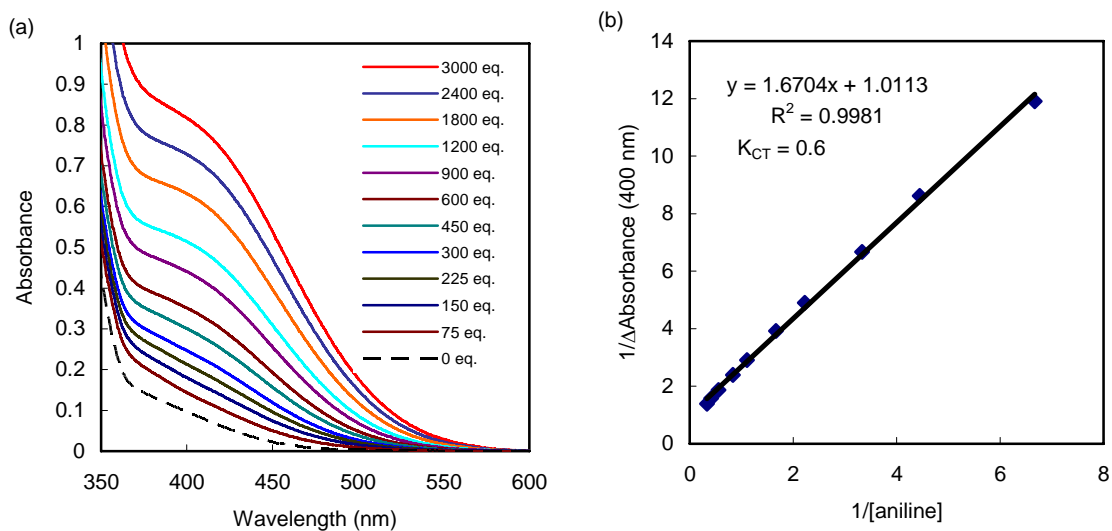

**Figure S12.** (a) Absorption spectra of **2** in CHCl<sub>3</sub> at 1 × 10<sup>-3</sup> M in the presence of 0–3000 equiv of aniline. (b) Benesi-Hildebrand plot

## 6. Theoretical calculations<sup>S2</sup>

**Table S1.** MP2/6-311++G\*\*//B3LYP/6-311G\*\* energetic data for the monomer, dimer, and trimer of aniline.

|                                 | number of<br>monomers | total energy<br>(a.u.) | relative energy per mol<br>of aniline (kcal/mol) | number of<br>hydrogen bonding |
|---------------------------------|-----------------------|------------------------|--------------------------------------------------|-------------------------------|
| monomer                         | 1                     | -285.803871314         | 0                                                | 0                             |
| dimer                           | 2                     | -571.611539598         | -1.191                                           | 2                             |
| N-H... $\pi$ type cyclic trimer | 3                     | -857.419855437         | -1.723                                           | 3                             |
| N-H...N type cyclic trimer      | 3                     | -857.424391438         | -2.672                                           | 3                             |

**Table S2.** Coordinates of aniline.

| Center<br>Number | Atomic<br>Number | Atomic<br>Type | Coordinates (Angstroms) |           |           |
|------------------|------------------|----------------|-------------------------|-----------|-----------|
|                  |                  |                | X                       | Y         | Z         |
| 1                | 6                | 0              | 0.220261                | 1.205782  | -0.004317 |
| 2                | 6                | 0              | -1.170100               | 1.200202  | 0.003256  |
| 3                | 6                | 0              | -1.878969               | 0.000001  | 0.007332  |
| 4                | 6                | 0              | -1.170101               | -1.200201 | 0.003256  |
| 5                | 6                | 0              | 0.220260                | -1.205782 | -0.004319 |
| 6                | 6                | 0              | 0.938343                | 0.000000  | -0.007209 |
| 7                | 7                | 0              | 2.333300                | -0.000002 | -0.076328 |
| 8                | 1                | 0              | 0.759681                | 2.147956  | -0.012704 |
| 9                | 1                | 0              | -1.703237               | 2.144819  | 0.007014  |
| 10               | 1                | 0              | -2.962283               | 0.000001  | 0.013865  |
| 11               | 1                | 0              | -1.703238               | -2.144819 | 0.007014  |
| 12               | 1                | 0              | 0.759679                | -2.147957 | -0.012710 |
| 13               | 1                | 0              | 2.779068                | -0.836027 | 0.271931  |
| 14               | 1                | 0              | 2.779067                | 0.836039  | 0.271893  |

**Table S3.** Coordinates of aniline dimer.

| Center<br>Number | Atomic<br>Number | Atomic<br>Type | Coordinates (Angstroms) |           |           |
|------------------|------------------|----------------|-------------------------|-----------|-----------|
|                  |                  |                | X                       | Y         | Z         |
| 1                | 6                | 0              | 1.876071                | 1.137830  | 0.465880  |
| 2                | 6                | 0              | 2.970721                | 1.326589  | -0.371901 |
| 3                | 6                | 0              | 3.820980                | 0.267049  | -0.687021 |
| 4                | 6                | 0              | 3.558830                | -0.988901 | -0.141391 |
| 5                | 6                | 0              | 2.465880                | -1.189990 | 0.694730  |
| 6                | 6                | 0              | 1.601190                | -0.128840 | 1.011210  |
| 7                | 7                | 0              | 0.531270                | -0.308960 | 1.882470  |
| 8                | 1                | 0              | 1.232541                | 1.974200  | 0.718260  |

|    |   |   |           |           |           |
|----|---|---|-----------|-----------|-----------|
| 9  | 1 | 0 | 3.162741  | 2.314439  | -0.777181 |
| 10 | 1 | 0 | 4.673640  | 0.418699  | -1.337701 |
| 11 | 1 | 0 | 4.211450  | -1.825011 | -0.369081 |
| 12 | 1 | 0 | 2.276739  | -2.173520 | 1.113740  |
| 13 | 1 | 0 | 0.218650  | -1.263509 | 1.983810  |
| 14 | 1 | 0 | -0.248610 | 0.318211  | 1.739960  |
| 15 | 6 | 0 | -2.466750 | -1.198778 | -0.679431 |
| 16 | 6 | 0 | -3.559380 | -0.986218 | 0.154290  |
| 17 | 6 | 0 | -3.820530 | 0.276772  | 0.683860  |
| 18 | 6 | 0 | -2.969529 | 1.331592  | 0.355160  |
| 19 | 6 | 0 | -1.875249 | 1.131361  | -0.480411 |
| 20 | 6 | 0 | -1.601430 | -0.142369 | -1.009631 |
| 21 | 7 | 0 | -0.531900 | -0.334259 | -1.878891 |
| 22 | 1 | 0 | -2.278401 | -2.187719 | -1.085861 |
| 23 | 1 | 0 | -4.212570 | -1.818858 | 0.392810  |
| 24 | 1 | 0 | -4.672940 | 0.437342  | 1.332720  |
| 25 | 1 | 0 | -3.160739 | 2.324672  | 0.747850  |
| 26 | 1 | 0 | -1.231119 | 1.963921  | -0.743611 |
| 27 | 1 | 0 | 0.248870  | 0.293481  | -1.743921 |
| 28 | 1 | 0 | -0.220660 | -1.290399 | -1.968911 |

**Table S4.** Coordinates of N–H··· $\pi$  type cyclic aniline trimer.

| Center Number | Atomic Number | Atomic Type | Coordinates (Angstroms) |           |           |
|---------------|---------------|-------------|-------------------------|-----------|-----------|
|               |               |             | X                       | Y         | Z         |
| 1             | 7             | 0           | 0.973367                | -2.557285 | -0.754803 |
| 2             | 6             | 0           | 2.037982                | -1.785877 | -0.322613 |
| 3             | 6             | 0           | 3.087562                | -1.445207 | -1.195529 |
| 4             | 6             | 0           | 4.185807                | -0.724173 | -0.739770 |
| 5             | 6             | 0           | 4.273186                | -0.317633 | 0.591899  |
| 6             | 6             | 0           | 3.235041                | -0.651331 | 1.463385  |
| 7             | 6             | 0           | 2.130579                | -1.370447 | 1.018730  |
| 8             | 1             | 0           | 0.123695                | -2.522022 | -0.209288 |
| 9             | 1             | 0           | 0.800240                | -2.567479 | -1.747768 |
| 10            | 1             | 0           | 3.040001                | -1.763567 | -2.232445 |
| 11            | 1             | 0           | 4.983145                | -0.479460 | -1.433510 |
| 12            | 1             | 0           | 5.131253                | 0.241953  | 0.943575  |
| 13            | 1             | 0           | 3.285445                | -0.350328 | 2.504582  |
| 14            | 1             | 0           | 1.331454                | -1.625788 | 1.706027  |
| 15            | 7             | 0           | -2.782342               | 0.470079  | -0.676133 |
| 16            | 6             | 0           | -2.609052               | -0.843532 | -0.276045 |
| 17            | 6             | 0           | -2.275146               | -1.155166 | 1.054993  |
| 18            | 6             | 0           | -2.167375               | -2.479148 | 1.467738  |
| 19            | 6             | 0           | -2.379808               | -3.529750 | 0.573734  |
| 20            | 6             | 0           | -2.708587               | -3.227490 | -0.748020 |
| 21            | 6             | 0           | -2.821253               | -1.907774 | -1.171891 |

|    |   |   |           |           |           |
|----|---|---|-----------|-----------|-----------|
| 22 | 1 | 0 | -2.704156 | 0.651833  | -1.664572 |
| 23 | 1 | 0 | -2.343694 | 1.185512  | -0.113076 |
| 24 | 1 | 0 | -2.108476 | -0.348395 | 1.760647  |
| 25 | 1 | 0 | -1.916135 | -2.691295 | 2.501674  |
| 26 | 1 | 0 | -2.294579 | -4.558924 | 0.900251  |
| 27 | 1 | 0 | -2.880793 | -4.028339 | -1.459290 |
| 28 | 1 | 0 | -3.088242 | -1.689596 | -2.201395 |
| 29 | 7 | 0 | 1.813678  | 2.134506  | -0.568486 |
| 30 | 6 | 0 | 0.574656  | 2.648778  | -0.232113 |
| 31 | 6 | 0 | 0.072431  | 2.525368  | 1.076797  |
| 32 | 6 | 0 | -1.144253 | 3.101497  | 1.426730  |
| 33 | 6 | 0 | -1.900294 | 3.808483  | 0.490137  |
| 34 | 6 | 0 | -1.409055 | 3.932039  | -0.810027 |
| 35 | 6 | 0 | -0.193377 | 3.362089  | -1.171080 |
| 36 | 1 | 0 | 1.986831  | 1.978535  | -1.548999 |
| 37 | 1 | 0 | 2.184077  | 1.397404  | 0.014899  |
| 38 | 1 | 0 | 0.650939  | 1.981751  | 1.815999  |
| 39 | 1 | 0 | -1.504126 | 2.998450  | 2.445126  |
| 40 | 1 | 0 | -2.846495 | 4.256117  | 0.768406  |
| 41 | 1 | 0 | -1.977441 | 4.481366  | -1.553095 |
| 42 | 1 | 0 | 0.179872  | 3.476823  | -2.184117 |

**Table S5.** Coordinates of N–H···N type cyclic aniline trimer.

| Center Number | Atomic Number | Atomic Type | Coordinates (Angstroms) |           |           |
|---------------|---------------|-------------|-------------------------|-----------|-----------|
|               |               |             | X                       | Y         | Z         |
| 1             | 6             | 0           | 1.925501                | -3.216070 | -1.327494 |
| 2             | 6             | 0           | 3.016998                | -3.947659 | -0.872540 |
| 3             | 6             | 0           | 3.434804                | -3.853045 | 0.453926  |
| 4             | 6             | 0           | 2.738260                | -3.014949 | 1.322407  |
| 5             | 6             | 0           | 1.643515                | -2.280477 | 0.877345  |
| 6             | 6             | 0           | 1.221453                | -2.371212 | -0.457565 |
| 7             | 7             | 0           | 0.158682                | -1.582023 | -0.924443 |
| 8             | 1             | 0           | 1.613552                | -3.293447 | -2.364528 |
| 9             | 1             | 0           | 3.544818                | -4.597218 | -1.562388 |
| 10            | 1             | 0           | 4.285608                | -4.424647 | 0.804833  |
| 11            | 1             | 0           | 3.044952                | -2.932958 | 2.359573  |
| 12            | 1             | 0           | 1.102688                | -1.637072 | 1.563419  |
| 13            | 1             | 0           | -0.503176               | -1.285011 | -0.208120 |
| 14            | 1             | 0           | -0.324958               | -1.978856 | -1.719274 |
| 15            | 6             | 0           | -3.544681               | 0.481656  | -0.755467 |
| 16            | 6             | 0           | -4.879546               | 0.333321  | -1.116852 |
| 17            | 6             | 0           | -5.808859               | -0.181851 | -0.215013 |
| 18            | 6             | 0           | -5.380580               | -0.546005 | 1.060433  |
| 19            | 6             | 0           | -4.047630               | -0.403060 | 1.430341  |
| 20            | 6             | 0           | -3.108607               | 0.114044  | 0.526357  |

|    |   |   |           |           |           |
|----|---|---|-----------|-----------|-----------|
| 21 | 7 | 0 | -1.750338 | 0.201207  | 0.868912  |
| 22 | 1 | 0 | -2.830393 | 0.891397  | -1.461823 |
| 23 | 1 | 0 | -5.195518 | 0.628045  | -2.111829 |
| 24 | 1 | 0 | -6.848215 | -0.294024 | -0.499436 |
| 25 | 1 | 0 | -6.089842 | -0.945519 | 1.777211  |
| 26 | 1 | 0 | -3.725440 | -0.695953 | 2.424864  |
| 27 | 1 | 0 | -1.216104 | 0.891913  | 0.341486  |
| 28 | 1 | 0 | -1.583445 | 0.291084  | 1.862253  |
| 29 | 6 | 0 | 1.372073  | 2.343802  | -0.523877 |
| 30 | 6 | 0 | 2.396008  | 1.715927  | 0.199499  |
| 31 | 6 | 0 | 3.401482  | 2.472336  | 0.793191  |
| 32 | 6 | 0 | 1.385160  | 3.741015  | -0.636195 |
| 33 | 6 | 0 | 2.396941  | 4.487528  | -0.041827 |
| 34 | 6 | 0 | 3.411839  | 3.861381  | 0.679602  |
| 35 | 7 | 0 | 0.315680  | 1.592897  | -1.071903 |
| 36 | 1 | 0 | 2.407126  | 0.634299  | 0.284161  |
| 37 | 1 | 0 | 4.187494  | 1.966919  | 1.343824  |
| 38 | 1 | 0 | 0.594499  | 4.240012  | -1.188311 |
| 39 | 1 | 0 | 2.390087  | 5.567345  | -0.143994 |
| 40 | 1 | 0 | 4.198980  | 4.445480  | 1.141365  |
| 41 | 1 | 0 | 0.527206  | 0.608722  | -1.233185 |
| 42 | 1 | 0 | -0.092873 | 2.014846  | -1.895683 |

---

## 7. References

- S1 G. M. Sheldrick, SHELX-97, A Program for the Solution of Crystal Structures, University of Göttingen, Germany, 1997.
- S2 M. J. Frisch, G. W. Trucks, H. B. Schlegel, G. E. Scuseria, M. A. Robb, J. R. Cheeseman, J. A. Montgomery, Jr., T. Vreven, K. N. Kudin, J. C. Burant, J. M. Millam, S. S. Iyengar, J. Tomasi, V. Barone, B. Mennucci, M. Cossi, G. Scalmani, N. Rega, G. A. Petersson, H. Nakatsuji, M. Hada, M. Ehara, K. Toyota, R. Fukuda, J. Hasegawa, M. Ishida, T. Nakajima, Y. Honda, O. Kitao, H. Nakai, M. Klene, X. Li, J. E. Knox, H. P. Hratchian, J. B. Cross, V. Bakken, C. Adamo, J. Jaramillo, R. Gomperts, R. E. Stratmann, O. Yazyev, A. J. Austin, R. Cammi, C. Pomelli, J. W. Ochterski, P. Y. Ayala, K. Morokuma, G. A. Voth, P. Salvador, J. J. Dannenberg, V. G. Zakrzewski, S. Dapprich, A. D. Daniels, M. C. Strain, O. Farkas, D. K. Malick, A. D. Rabuck, K. Raghavachari, J. B. Foresman, J. V. Ortiz, Q. Cui, A. G. Baboul, S. Clifford, J. Cioslowski, B. B. Stefanov, G. Liu, A. Liashenko, P. Piskorz, I. Komaromi, R. L. Martin, D. J. Fox, T. Keith, M. A. Al-Laham, C. Y. Peng, A. Nanayakkara, M. Challacombe, P. M. W. Gill, B. Johnson, W. Chen, M. W. Wong, C. Gonzalez and J. A. Pople, Gaussian 03 revision C.02; Gaussian Inc.: Wallingford CT 2004.
